# Supplementary material
Source: PubMed Central journal article supplement (PMC528952)

**A**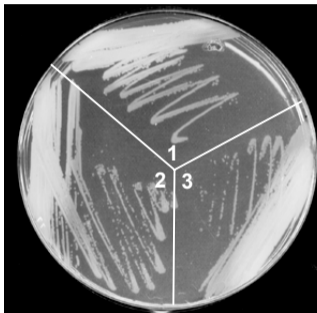**+ N****B**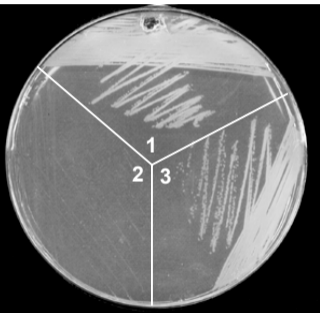**- N**

Supplement: pnas_101_46_16316__1.pdf [file pnas_101_46_16316__1.pdf]

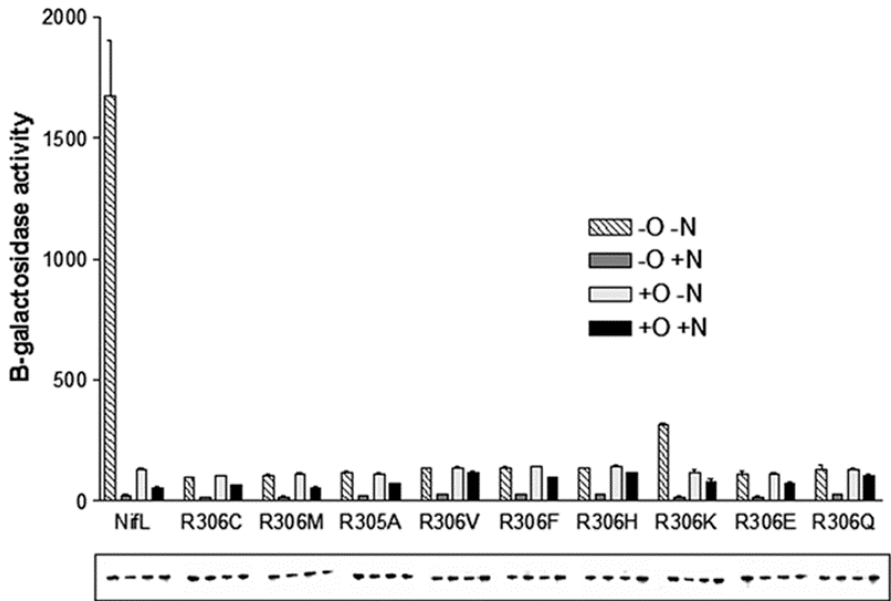

Supplement: pnas_101_46_16316__2.pdf [file pnas_101_46_16316__2.pdf]
